# Supplementary material for: Antimicrobial, Antioxidant, Anti-Inflammatory, and Cytotoxic Activities of Propolis from the Stingless BeeTetragonisca fiebrigi(Jataí)
Source: Hindawi journal article supplement (doi:10.1155/2015/296186), 2015-01-01

# Graphical abstract

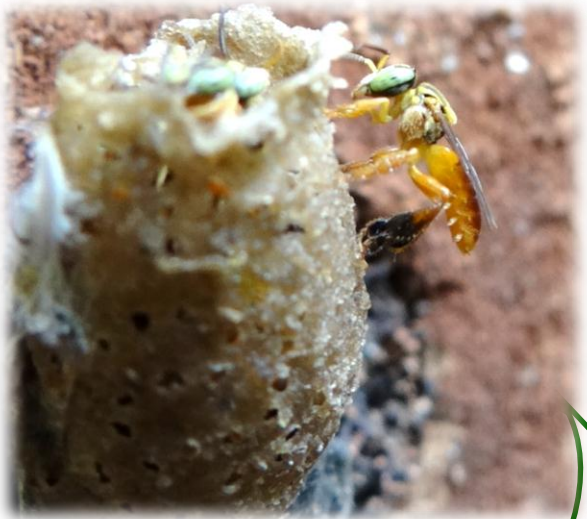

*Tetragonisca fiebrigi*

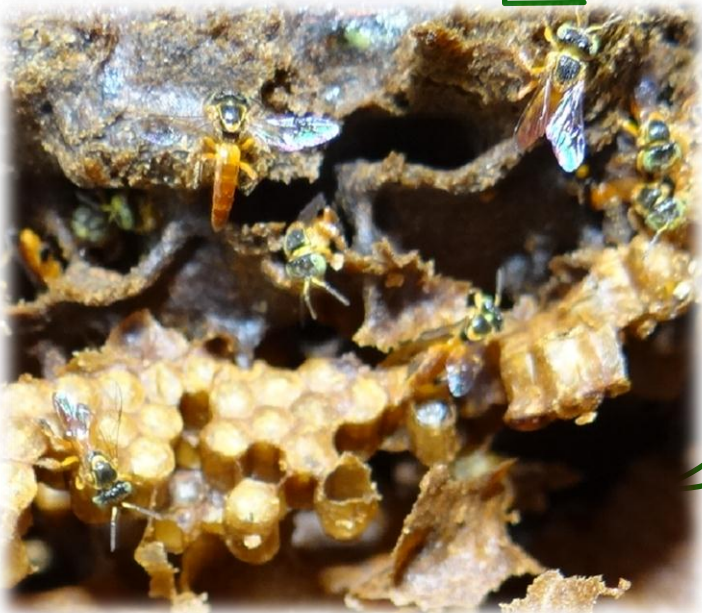

Propolis from *T. fiebrigi*

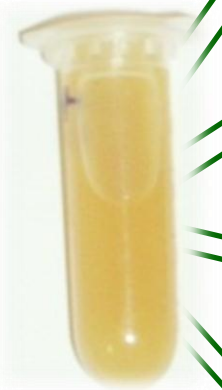

Ethanol extract of propolis

## Antimicrobial activity

- Gram-positive bacteria
- Gram-negative bacteria
- Fungi

## Antioxidant activity

- Scavenging free radicals
- ↓ hemolysis
- ↓ Lipid peroxidation in human erythrocytes

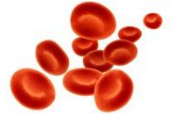

## Anti-inflammatory activity

Hyaluronidase enzyme

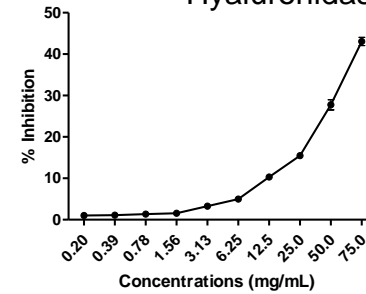

## Cytotoxic activity – K562 cells

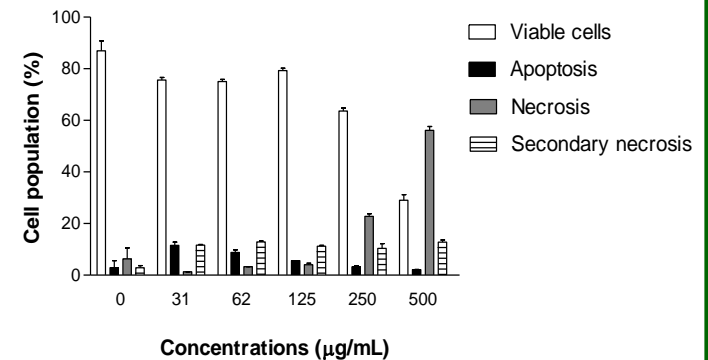

Supplement: f1 [file 296186.f1.pdf]
